# Supplementary material
Source: publisher site journal article supplement (https://www.dovepress.com/article/197252)
Supplement: Supplementary file 1 [file get_supplementary_file.php]

Journal: *Pragmatic and Observational Research*.

**Title**: Using claims data to attribute patients with breast, lung, or colorectal cancer to prescribing oncologists

**Authors**: Ezra Fishman, PhD,1 John Barron, PharmD,1 Ying Liu, MS, PhD,1 Santosh Gautam, PhD,2 Justin E. Bekelman, MD,3 Amol S. Navathe, MD, PhD,3 Michael J. Fisch, MD,4 Ann Nguyen, PharmD5, Gosia Sylwestrzak, MA1

1HealthCore, Inc., Wilmington, DE, USA

2Vector Oncology; employee of HealthCore, Inc., at time of study, Wilmington, DE, USA

3University of Pennsylvania, Perelman School of Medicine, Philadelphia, PA, USA

4AIM Specialty Health, Chicago, IL, USA

5Anthem Inc., Woodland Hills, CA, USA

**Corresponding author:**

Ezra Fishman, PhD

HealthCore, Inc.

123 Justison Street, Suite 200, Wilmington DE 19801.

Tel: 302-230-2091; Fax: 302-230-2020

Email: efishman@healthcore.com

**Funding source:** This study was funded by Anthem Inc., which had no role in the conduct of the study or the decision to publish the results.

**Appendix A: Code lists**

Cancer diagnosis:

**Table SA1. Breast Cancer ICD-9 and ICD-10 Codes**

| **Diagnosis Code Start With** | | |
| --- | --- | --- |
| **ICD9** | **ICD10** | |
| 1740 | C50011 | C50421 |
| 1741 | C50012 | C50422 |
| 1742 | C50019 | C50429 |
| 1743 | C50021 | C50511 |
| 1744 | C50022 | C50512 |
| 1745 | C50029 | C50519 |
| 1746 | C50111 | C50521 |
| 1748 | C50112 | C50522 |
| 1749 | C50119 | C50529 |
| 1750 | C50121 | C50611 |
| 1759 | C50122 | C50612 |
|  | C50129 | C50619 |
|  | C50211 | C50621 |
|  | C50212 | C50622 |
|  | C50219 | C50629 |
|  | C50221 | C50811 |
|  | C50222 | C50812 |
|  | C50229 | C50819 |
|  | C50311 | C50821 |
|  | C50312 | C50822 |
|  | C50319 | C50829 |
|  | C50321 | C50911 |
|  | C50322 | C50912 |
|  | C50329 | C50919 |
|  | C50411 | C50921 |
|  | C50412 | C50922 |
|  | C50419 | C50929 |

**Table SA2. Lung Cancer ICD-9 and ICD-10 Codes**

| **Diagnosis Code Start with** | |
| --- | --- |
| **ICD9** | **ICD10** |
| 1622 | C3400 |
| 1623 | C3401 |
| 1624 | C3402 |
| 1625 | C3410 |
| 1628 | C3411 |
| 1629 | C3412 |
|  | C342 |
|  | C3430 |
|  | C3431 |
|  | C3432 |
|  | C3480 |
|  | C3481 |
|  | C3482 |
|  | C3490 |
|  | C3491 |
|  | C3492 |

**Table SA3. Colorectal Cancer ICD-9 and ICD-10 Codes**

| **Diagnosis Code Start With** | |
| --- | --- |
| **ICD9** | **ICD10** |
| 1530 | C180 |
| 1531 | C181 |
| 1532 | C182 |
| 1533 | C183 |
| 1534 | C184 |
| 1535 | C185 |
| 1536 | C186 |
| 1537 | C187 |
| 1538 | C188 |
| 1539 | C189 |
| 1540 | C19 |
| 1541 | C20 |

**Table SA4: Codes for cancer drugs**

**CPT/HCPCS Codes**

Note: CPT (Current Procedural Terminology) is a registered trademark of the American Medical Association.

| **GenericName** | **Code** | **RouteAdmin** |
| --- | --- | --- |
| 5-Fluorouracil | J9190 | Chemo Inj |
| Ado-trastuzumab | J9354 | Chemo Inj |
| Atezolizumab | C9483 | Chemo Inj |
| Bevacizumab | C9257 | Chemo Inj |
| Bevacizumab | J9035 | Chemo Inj |
| Bevacizumab | Q2024 | Chemo Inj |
| Bortezomib | J9041 | Targeted Inj |
| Bortezomib | C9207 | Targeted Inj |
| Capecitabine | J8520 | Chemo Oral |
| Capecitabine | J8521 | Chemo Oral |
| Carboplatin | J9045 | Chemo Inj |
| Carfilzomib | J9047 | Targeted Inj |
| Carfilzomib | C9295 | Targeted Inj |
| Cetuximab | C9215 | Targeted Inj |
| Cetuximab | J9055 | Targeted Inj |
| Cisplatin | J9062 | Chemo Inj |
| Cisplatin | J9060 | Chemo Inj |
| Cyclophosphamide | J8530 | Chemo Oral |
| Cyclophosphamide | J9070 | Chemo Inj |
| Cyclophosphamide | J9091 | Chemo Inj |
| Cyclophosphamide | J9080 | Chemo Inj |
| Cyclophosphamide | J9090 | Chemo Inj |
| Cyclophosphamide | J9092 | Chemo Inj |
| Cyclophosphamide | J9093 | Chemo Inj |
| Cyclophosphamide | J9094 | Chemo Inj |
| Cyclophosphamide | J9095 | Chemo Inj |
| Cyclophosphamide | J9096 | Chemo Inj |
| Cyclophosphamide | J9097 | Chemo Inj |
| Docetaxel | J9170 | Chemo Inj |
| Docetaxel | J9171 | Chemo Inj |
| Doxorubicin | J9001 | Chemo Inj |
| Doxorubicin | J9000 | Chemo Inj |
| Doxorubicin | Q2049 | Chemo Inj |
| Doxorubicin | Q2050 | Chemo Inj |
| Durvalumab | J9492 | Chemo Inj |
| Epirubicin | J9178 | Chemo Inj |
| Eribulin | J9179 | Chemo Inj |
| Etoposide | J9181 | Chemo Inj |
| Etoposide | J9182 | Chemo Inj |
| Etoposide | J8181 | Chemo Inj |
| Etoposide | J8560 | Chemo Inj |
| Etoposide | C9414 | Chemo Inj |
| Etoposide | C9425 | Chemo Inj |
| Floxuridine | J9200 | Chemo Inj |
| Fulvestrant | J9395 | Chemo Inj |
| Gefitinib | J8565 | Targeted Oral |
| Gemcitabine | J9201 | Chemo Inj |
| Goserelin | J9202 | Endocrine Inj |
| Ifosfamide | C9427 | Chemo Inj |
| Ifosfamide | J9208 | Chemo Inj |
| Ipilimumab | J9228 | Targeted Inj |
| Irinotecan | J9206 | Chemo Inj |
| Ixabepilone | J9207 | Chemo Inj |
| Leucovorin | J0640 | Chemo Inj |
| Leuprolide | J1950 | Endocrine Inj |
| Leuprolide | J9217 | Endocrine Inj |
| Leuprolide | J9218 | Endocrine Inj |
| Leuprolide | J9219 | Endocrine Inj |
| Levoleucovorin | J0641 | Chemo Inj |
| Liposomal doxorubicin | J9002 | Chemo Inj |
| Methotrexate | J9260 | Chemo Inj |
| Methotrexate | J9250 | Chemo Inj |
| Methotrexate | J8610 | Chemo Inj |
| Nab-paclitaxel | C9217 | Chemo Inj |
| Nab-paclitaxel | J9264 | Chemo Inj |
| Nivolumab | J9299 | Targeted Inj |
| Oxaliplatin | J9263 | Chemo Inj |
| Paclitaxel | C9431 | Chemo Inj |
| Paclitaxel | J9265 | Chemo Inj |
| Paclitaxel | J9267 | Chemo Inj |
| Panitumumab | J9303 | Targeted Inj |
| Pembrolizumab | J9271 | Targeted Inj |
| Pembrolizumab | C9027 | Targeted Inj |
| Pemetrexed | C9213 | Chemo Inj |
| Pemetrexed | J9305 | Chemo Inj |
| Pertuzumab | J9306 | Targeted inj |
| Ramucirumab | J9308 | Targeted Inj |
| Ramucirumab | C9025 | Targeted Inj |
| Temozolomide | J9330 | Chemo Inj |
| Temozolomide | J9328 | Chemo Inj |
| Temozolomide | J8700 | Chemo Inj |
| Topotecan | J9350 | Chemo Inj |
| Topotecan | J9351 | Chemo Inj |
| Topotecan | J8705 | Chemo Inj |
| Trastuzumab | J9355 | Targeted Inj |
| Vinblastine | J9360 | Chemo Inj |
| Vincristine | J9370 | Chemo Inj |
| Vincristine | J9371 | Chemo Inj |
| Vinorelbine | C9440 | Chemo Inj |
| Vinorelbine | J9390 | Chemo Inj |
| Ziv-aflibercept | J9400 | Targeted Inj |
| Ziv-aflibercept | C9296 | Targeted Inj |

**Generic names**

| **GenericName** | **RouteAdmin** |
| --- | --- |
| 5-Fluorouracil | Chemo Inj |
| Abemaciclib | Targeted Oral |
| Acalabrutinib | Targeted Oral |
| Ado-trastuzumab | Chemo Inj |
| Afatinib | Targeted Oral |
| Alectinib HCl | Targeted Oral |
| Altretamine | Chemo Oral |
| Anastrozole | Endocrine Oral |
| Axitinib | Targeted Oral |
| Belinostat | Targeted Inj |
| Bevacizumab | Chemo Inj |
| Bexarotene | Chemo Oral |
| Bortezomib | Targeted Inj |
| Bosutinib | Targeted Oral |
| Brigatinib | Targeted Oral |
| Busulfan | Chemo Oral |
| Cabozantinib | Targeted Oral |
| Capecitabine | Chemo Oral |
| Carboplatin | Chemo Inj |
| Carfilzomib | Targeted Inj |
| Ceritinib | Targeted Oral |
| Cetuximab | Targeted Inj |
| Chlorambucil | Chemo Oral |
| Cisplatin | Chemo Inj |
| Cobimetinib | Targeted Oral |
| Copanlisib | Targeted Inj |
| Crizotinib | Targeted Oral |
| Cyclophosphamide | Chemo Oral |
| Dabrafenib | Targeted Oral |
| Dasatinib | Targeted Oral |
| Docetaxel | Chemo Inj |
| Doxorubicin | Chemo Inj |
| Doxorubicin liposomal | Chemo Inj |
| Durvalumab | Chemo Inj |
| Enasidenib | Targeted Oral |
| Epirubicin | Chemo Inj |
| Erlotinib | Targeted Oral |
| Etoposide | Chemo Oral |
| Etoposide | Chemo Oral |
| Everolimus | Targeted Oral |
| Exemestane | Endocrine Oral |
| Floxuridine | Chemo Inj |
| Fulvestrant | Endocrine Inj |
| Gefitinib | Targeted Oral |
| Gemcitabine | Chemo Inj |
| Goserelin | Endocrine Inj |
| Hydroxyurea | Chemo Oral |
| Ibrutinib | Targeted Oral |
| Idelalisib | Targeted Oral |
| Ifosfamide | Chemo Inj |
| Imatinib | Targeted Oral |
| Irinotecan | Chemo Inj |
| Ixabepilone | Chemo Inj |
| Ixazomib | Targeted Oral |
| Lapatinib | Targeted Oral |
| Lenvatinib | Targeted Oral |
| Letrozole | Endocrine Oral |
| Leucovorin Calcium | Chemo Oral |
| Leuprolide | Endocrine Inj |
| Levoleucovorin | Chemo Inj |
| Lomustine | Chemo Oral |
| Melphalan | Chemo Oral |
| Mercaptopurine | Chemo Oral |
| Mesna | Chemo Oral |
| Methotrexate | Chemo Oral |
| Midostaurin | Targeted Oral |
| Mitotane | Chemo Oral |
| Nab-paclitaxel | Chemo Inj |
| Neratinib | Targeted Oral |
| Nilotinib | Targeted Oral |
| Niraparib | Targeted Oral |
| Olaparib | Targeted Oral |
| Osimertinib | Targeted Oral |
| Oxaliplatin | Chemo Inj |
| Paclitaxel | Chemo Inj |
| Palbociclib | Targeted Oral |
| Panitumumab | Targeted Inj |
| Panobinostat | Targeted Oral |
| Pazopanib | Targeted Oral |
| Pemetrexed | Chemo Inj |
| Pertuzumab | Targeted Inj |
| Pomalidomide | Chemo Oral |
| Procarbazine | Chemo Oral |
| Regorafenib | Targeted Oral |
| Ribociclib | Targeted Oral |
| Ribociclib Succinate-Letrozole | Targeted Oral |
| Ribociclib Succinate-Letrozole | Endocrine Oral |
| Romidepsin | Targeted Inj |
| Rucaparib | Targeted Oral |
| Ruxolitinib | Targeted Oral |
| Sonidegib | Chemo Oral |
| Sorafenib | Targeted Oral |
| Sunitinib | Targeted Oral |
| Tamoxifen | Endocrine Oral |
| Temozolomide | Chemo Oral |
| Temsirolimus | Targeted Inj |
| Thioguanine | Chemo Oral |
| Topotecan | Chemo Oral |
| Toremifene | Endocrine Oral |
| Trametinib | Targeted Oral |
| Trastuzumab | Targeted Inj |
| Tretinoin | Chemo Oral |
| Trifluridine-Tipiracil | Chemo Oral |
| Trifluridine-Tipiracil | Chemo Oral |
| Vandetanib | Targeted Oral |
| Vemurafenib | Targeted Oral |
| Venetoclax | Chemo Oral |
| Vinblastine | Chemo Inj |
| Vincristine | Chemo Inj |
| Vinorelbine | Chemo Inj |
| Vismodegib | Chemo Oral |
| Vorinostat | Targeted Oral |
| Ziv-aflibercept | Targeted Inj |

**NDC codes:**

If there are non-specific chemotherapy codes with CPT/HCPCS code in (J3490, J3590, J9999, C9339, J8999), then look for following NDC code in the same claim line:

| **NDC** | **Description** | **GenericName** | **RouteAdmin** |
| --- | --- | --- | --- |
| 68817013450 | ABRAXANE | Paclitaxel | Chemo Inj |
| 51144005001 | ADCETRIS | Brentuximab Vedotin | Chemo Inj |
| 00002764001 | ALIMTA | Pemetrexed | Chemo Inj |
| 63459034804 | BENDEKA | Bendamustine | Chemo Inj |
| 00703424801 | CARBOPLATIN | Carboplatin | Chemo Inj |
| 61703033950 | CARBOPLATIN | Carboplatin | Chemo Inj |
| 57894050205 | DARZALEX | Daratumumab | Chemo Inj |
| 66733095823 | ERBITUX | Cetuximab | Chemo Inj |
| 50242005656 | HERCEPTIN | Trastuzumab | Chemo Inj |
| 50242013468 | HERCEPTIN | Trastuzumab | Chemo Inj |
| 50242008701 | KADCYLA | Ado-Trastuzumab Emtansine | Chemo Inj |
| 50242008801 | KADCYLA | Ado-Trastuzumab Emtansine | Chemo Inj |
| 00006302602 | KEYTRUDA | Pembrolizumab | Chemo Inj |
| 00006302901 | KEYTRUDA | Pembrolizumab | Chemo Inj |
| 00006302902 | KEYTRUDA | Pembrolizumab | Chemo Inj |
| 76075010101 | KYPROLIS | Carfilzomib | Targeted Inj |
| 00002892601 | LARTRUVO | Olaratumab | Chemo Inj |
| 00703514001 | LEUCOVORIN CALCIUM | Leucovorin Calcium | Chemo Inj |
| 69171039801 | ONIVYDE | Irinotecan HCl Liposome | Chemo Inj |
| 00003377211 | OPDIVO | Nivolumab | Chemo Inj |
| 00003377412 | OPDIVO | Nivolumab | Chemo Inj |
| 00703398501 | OXALIPLATIN | Oxaliplatin | Chemo Inj |
| 00955172510 | OXALIPLATIN | Oxaliplatin | Chemo Inj |
| 00703476701 | PACLITAXEL | Paclitaxel | Chemo Inj |
| 55390011450 | PACLITAXEL | Paclitaxel | Chemo Inj |
| 61703034222 | PACLITAXEL | Paclitaxel | Chemo Inj |
| 61703034250 | PACLITAXEL | Paclitaxel | Chemo Inj |
| 50242014501 | PERJETA | Pertuzumab | Chemo Inj |
| 00002771601 | PORTRAZZA | Necitumumab | Chemo Inj |
| 50242091701 | TECENTRIQ | Atezolizumab | Chemo Inj |
| 00173075200 | TYKERB | Lapatinib Ditosylate | Targeted Oral |
| 00004110020 | XELODA | Capecitabine | Chemo Oral |
| 00004110150 | XELODA | Capecitabine | Chemo Oral |
| 55513073001 | XGEVA | Denosumab | Chemo Inj |
| 00024584001 | ZALTRAP | Ziv-Aflibercept | Chemo Inj |
| 00024584101 | ZALTRAP | Ziv-Aflibercept | Chemo Inj |
| 00310450012 | IMFINZI | Durvalumab | Chemo Inj |
| 00310461150 | IMFINZI | Durvalumab | Chemo Inj |

**Appendix B** Comparisons between patients excluded from study and included patients

Table SB1: Characteristics of patients excluded entirely from study entirely vs. included patients

|  | Excluded (n=70,570) | Included (n=70,641) | Standardized Difference |
| --- | --- | --- | --- |
| Age: Mean (SD) | 60.0 (12.24) | 60.0 (12.24) | 0.0045 |
| Female: n (%) | 55,061 (78.0) | 55,862 (79.1) | 0.0257 |
| Breast cancer: n (%) | 43,890 (62.2) | 43,362 (61.4) | -0.0167 |
| Colorectal cancer: n (%) | 13,192 (18.7) | 11,406 (16.1) | -0.0672 |
| Lung cancer: n (%) | 14,491 (20.5) | 15,873 (22.5) | 0.0471 |

Table SB2: Number of oncologist encounters among patients excluded from PPV calculation vs. among those included in PPV calculation (among those included in the study), using 90-day time window

|  | Attributed patients not contributing to PPV | Attributed patients contributing to PPV | Std Diff |
| --- | --- | --- | --- |
| **n patients** | 47,067 | 18,312 |  |
| **# E&M claims w/ oncologist within 90-day time window (average)** | 4.1 | 4.6 | 0.21 |
| **# distinct oncologists seen for E&M visits within 90-day time window (average)** | 1.8 | 1.8 | 0.08 |

E&M = evaluation & management; PPV = positive predictive value; Std Diff = standardized difference.

Table SB3: Number of oncologist encounters among patients excluded from PPV calculation vs. among those included, with no time window

|  | Attributed patients not contributing to PPV | Attributed patients contributing to PPV | Std Diff |
| --- | --- | --- | --- |
| **n patients** | 49,553 | 18,887 |  |
| **# E&M claims w/ oncologist (average)** | 18.6 | 17.0 | -0.11 |
| **# distinct oncologists seen for E&M visits (average)** | 3.2 | 3.1 | -0.01 |

E&M = evaluation & management; PPV = positive predictive value; Std Diff = standardized difference.

**Appendix C**: Results by cancer type

Table SC1: Plurality method with 90-day time window

Number of patients

|  | Breast | Colorectal | Lung | Total |
| --- | --- | --- | --- | --- |
| Patient ID not attributed an NPI | 3,156 | 886 | 1,220 | 5,262 |
| Patient ID not in physician-reported data | 29,200 | 7,410 | 10,457 | 47,067 |
| Attribution not confirmed | 1,741 | 475 | 649 | 2,865 |
| Attribution confirmed | 9,265 | 2,635 | 3,547 | 15,447 |
| Total | 43,362 | 11,406 | 15,873 | 70,641 |

Percentage of patients

|  | Breast | Colorectal | Lung | Total |
| --- | --- | --- | --- | --- |
| Percent attributed: | 92.7% | 92.2% | 92.3% | 92.6% |
| PPV: | 84.2% | 84.7% | 84.5% | 84.4% |

Table SC2: Plurality method with no time window

Number of patients

|  | Breast | Colorectal | Lung | Total |
| --- | --- | --- | --- | --- |
| Patient ID not attributed an NPI | 1,053 | 453 | 695 | 2,201 |
| Patient ID not in physician-reported data | 30,927 | 7,755 | 10,871 | 49,553 |
| Attribution not confirmed | 2,214 | 618 | 828 | 3,660 |
| Attribution confirmed | 9,168 | 2,580 | 3,479 | 15,227 |
| Total | 43,362 | 11,406 | 15,873 | 70,641 |

Percentage of patients

|  | Breast | Colorectal | Lung | Total |
| --- | --- | --- | --- | --- |
| Percent attributed: | 97.6% | 96.0% | 95.6% | 96.9% |
| PPV: | 80.5% | 80.7% | 80.8% | 80.6% |

Table SC3: Nearest visit to index date

Number of patients

|  | Breast | Colorectal | Lung | Total |
| --- | --- | --- | --- | --- |
| Patient ID not attributed an NPI | 1,053 | 453 | 695 | 2,201 |
| Patient ID not in physician-reported data | 30,927 | 7,755 | 10,871 | 49,553 |
| Attribution not confirmed | 2,764 | 723 | 1,080 | 4,567 |
| Attribution confirmed | 8,618 | 2,475 | 3,227 | 14,320 |
| Total | 43,362 | 11,406 | 15,873 | 70,641 |

Percentage of patients

|  | Breast | Colorectal | Lung | Total |
| --- | --- | --- | --- | --- |
| Percent attributed: | 97.6% | 96.0% | 95.6% | 96.9% |
| PPV: | 75.7% | 77.4% | 74.9% | 75.8% |
